# Supplementary material
Source: PubMed Central journal article supplement (PMC6888900)
Supplement: 41422_2019_231_MOESM1_ESM.pdf [file 41422_2019_231_MOESM1_ESM.pdf]

**Fig. S1.**

```
WT BCL-xL                AGCAAGCGCTGAGGGAGGCAGGCGACGAGTTTGAACTGCGG-----  
Octa/BCL-xL KO BCL-xL a  AGCAAGCGCTGAGGGAGGCAGGCGACGAGTTTGAACTGCGGACCGCCGCCTTCTATGAAAGGTTGGGCTTCGGAATCGTTTTCCGGGACGCCGGCTGGATGATCCT  
Octa/BCL-xL KO BCL-xL b  AGCAAGCGCTGAGGGAGGCAGGCGACGAGTTTGAACTGCGGAAGGCAAAATGCCGCAAAAAGGAATACGGGCGACACGGAAATGTTGAATACTCATACTCTTCC  
  
WT BCL-xL                -----  
Octa/BCL-xL KO BCL-xL a  CCAGCGCGGGGATCTCATGCTGGAGTTCTTCGCCCACCCCAACTTGTTATTGCAGCTTATAATGGTTACAAATAAGCAATAGCATCACAAATTTACAAATAAA  
Octa/BCL-xL KO BCL-xL b  TTTTTCAATATTATTGAAGCATTTATCAGGGTTATTGTCTCATGAGCGGATACATATTTGAATGTATTTAGAAAAATAAACAAATAGGGGTTCCGCGCACATTTCC  
  
WT BCL-xL                -----  
Octa/BCL-xL KO BCL-xL a  GCATTTTTTTTCACTGCATTCTAGTTGTGGTTTGTCCAAACTCATCAATGTATCTTATCATGTCTGTATACCGTCGACCTCTAGCTAGAGCTTGGCGTAATCATGGT  
Octa/BCL-xL KO BCL-xL b  CCGAAAAGTGCCACCTGACGTCGACGGATCGGGAGATCTCCGATCCCTATGGTGCACCTCAGTACAATCTGCTCTGATGCCGCATAGTTAAGCCAGTATCTGC  
  
WT BCL-xL                -----  
Octa/BCL-xL KO BCL-xL a  -----TACCGGCGGGCATTCAGTGACCTGACATCCCAGCT  
Octa/BCL-xL KO BCL-xL b  CATAGCTGTTTCCTGTGTGAAATTGTTATCCGCTCA-----TACCGGCGGGCATTCAGTGACCTGACATCCCAGCT  
Octa/BCL-xL KO BCL-xL b  TCCCTGCTTGTGTGTTGGAGGTCGCTGAGTAGTGCGCGAGCAAAATTTAAGCTTACCGGCGGGCATTCAGTGACCTGACATCCCAGCT
```

**Fig. S1 Mutations of the targeted *BCL-xL* locus in Octa/*BCL-xL* KO cells.**

Genomic sequence of *BCL-xL* around the CRISPR target sites aligned with the wild-type sequence. The CRISPR target sequence is underlined. Insertions are labeled in green and the stop codons are labeled in red.
