# Supplementary material
Source: PubMed Central journal article supplement (PMC6888900)
Supplement: 41422_2019_231_MOESM2_ESM.pdf [file 41422_2019_231_MOESM2_ESM.pdf]

a

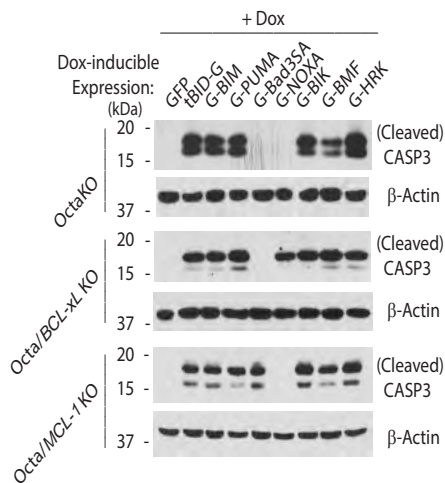

c

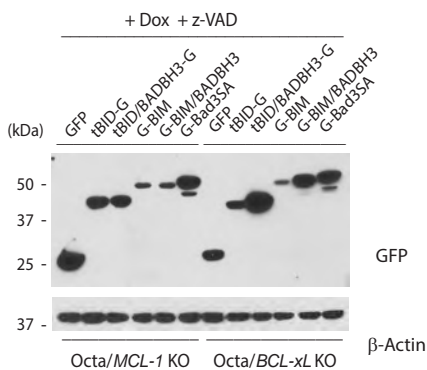

e

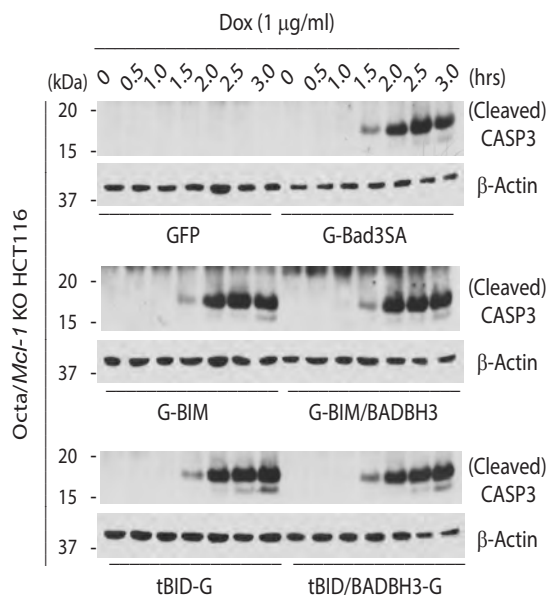

b

71 RIEADSESQEDIRNIRHRLAQVGSMDRSIPPGLVNGLA 110 tBID(BID)

71 RIEADSESQEWAAQRYGRELRRMSDEFVDSIPPGLVNGLA 110 tBID(BID)/BADBH3

133 SMRQAEPADM~~RP~~EIWIAQELRRIGDEFNAYARRVFLNNY 172 BIM

133 SMRQAEPADMWAAQRYGRELRRMSDEFVDSYARRVFLNNY 172 BIM/BADBH3

95 GRSRSAPPNLWAAQRYGRELRRMSDEFVDSFKKGLPRPKS 134 BAD (human)

132 GRSRSAPPNLWAAQRYGRELRRMSDEFEGSFKGLPRPKSA 171 Bad (mouse)

132 GRSRAAPPNLWAAQRYGRELRRM~~A~~DEFEGSFKGLPRPKSA 171 Bad3SA (mouse)

d

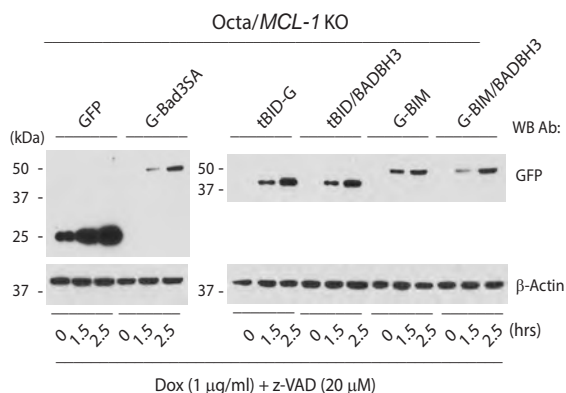

f

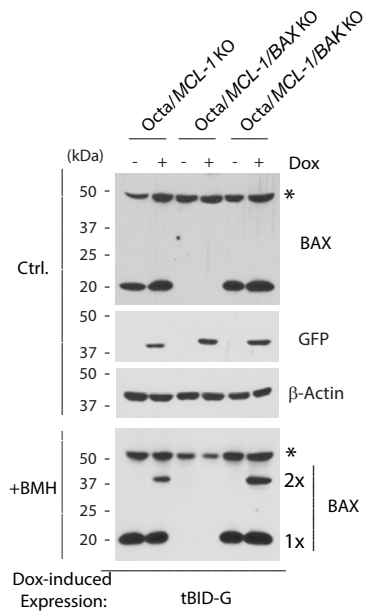

g

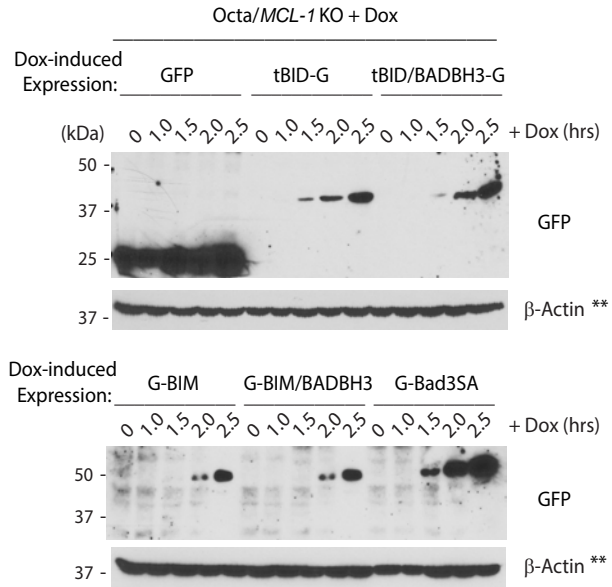

**Fig. S2 tBID and BIM cause BAX/BAK-mediated apoptosis by neutralizing anti-apoptotic BCL-2 proteins.**

(a) Cell lysates in Fig. 1b were subjected to western blot with the indicated antibodies. (b) Partial Amino acid sequences of BID (tBID), BIM, and their BH3 domain mutants. The BH3 sequences are in color. (c) Octa/*MCL-1* KO and Octa/*BCL-xL* KO cells with inducible expression of indicated GFP fusion proteins were treated with Dox (2  $\mu\text{g/ml}$ ) and z-VAD (20  $\mu\text{M}$ ) for three hours and harvested for western blot analysis. (d) Cells in Fig. 1h were treated with Dox (2  $\mu\text{g/ml}$ ) and z-VAD (20  $\mu\text{M}$ ) for the indicated time and harvested for western blot analysis. (e) Cell lysates in Fig. 1h were subjected to western blot with the indicated antibodies. (f) Cells were treated with Dox and z-VAD for the indicated amount of time before harvested. Whole cell lysates were incubated with or without BMH at room temperature for 1 hour. The reaction mixtures were then subjected to western blot analysis. “\*” indicates a non-specific protein. (g) Cell lysates in Fig. 1i were subjected to western blot with the indicated antibodies. \*\*: western blots of  $\beta$ -Actin are shared with Fig. 1i. Representatives from at least two independent experiments are shown for western blots.
