# Supplementary material
Source: PubMed Central journal article supplement (PMC6888900)
Supplement: 41422_2019_231_MOESM3_ESM.pdf [file 41422_2019_231_MOESM3_ESM.pdf]

**Fig. S3 Mutations in the targeted *BAX* and *BAK* loci of Octa/*MCL-1*/*BAX* KO and Octa/*MCL-1*/*BAK* KO cells.**

(a) Genomic sequence of *BAX* around the CRISPR target site in Octa/*MCL-1*/*BAX* KO cell aligned with the wild-type sequence. (b) Genomic sequence of *BAK* around the CRISPR target site in Octa/*MCL-1*/*BAK* KO cells aligned with the wild-type sequence. CRISPR target sites are underlined.
