# Supplementary material
Source: PubMed Central journal article supplement (PMC6888900)
Supplement: 41422_2019_231_MOESM4_ESM.pdf [file 41422_2019_231_MOESM4_ESM.pdf]

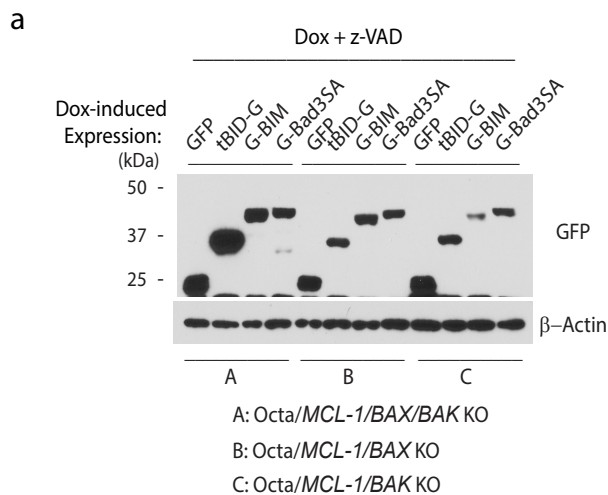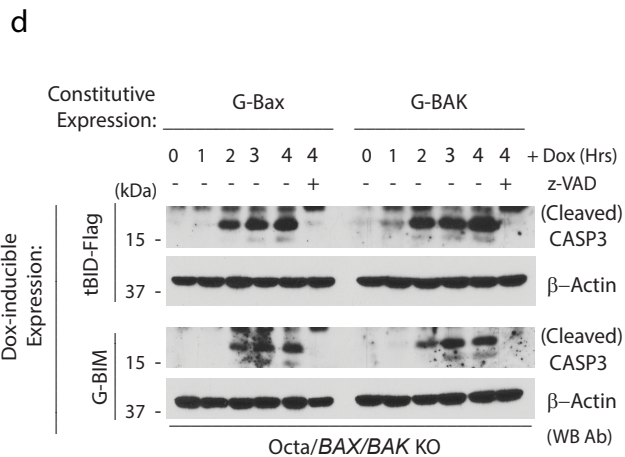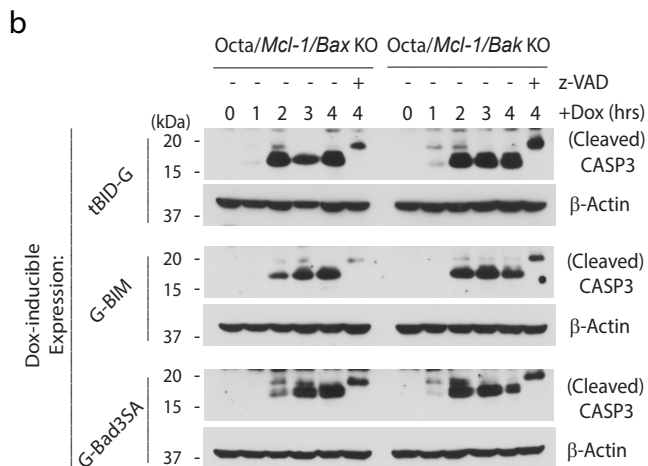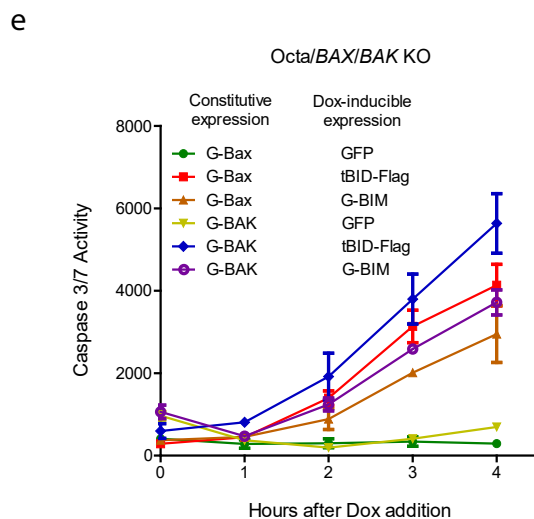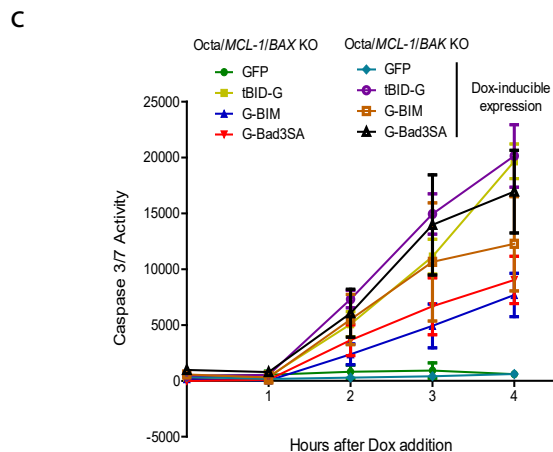

**Fig. S4 BIM, tBID and Bad do not exhibit preference for BAX or BAK.**

(a) Dox-induced expression of the BH3-only proteins in OctaKO derived cell lines (Fig. 2b). Cells from the indicated cell lines were treated with Dox (2  $\mu\text{g}/\text{ml}$ ) and z-VAD (20  $\mu\text{M}$ ) for 4 hours and harvested for western blot. (b) Cell lysates in Fig. 2d were subjected to western blot with the indicated antibodies. (c) Cells in Fig. 2b were treated with Dox for the indicated time points. Apo-ONE Caspase substrate/buffer for Caspase 3/7 was added to cells at the end of the treatment, and the plates were analyzed on a fluorescence microplate reader. Results are the mean and SEM of two independent experiments. (d) Cells were treated the same way as Fig. 2g. Whole cell lysates for the indicated cells were analyzed by western blot. (e) Cells in Fig. 2e were treated with Dox for the indicated time points. Apo-ONE Caspase substrate/buffer for Caspase 3/7 was added to cells at the end of the treatment, and the plates were analyzed on a fluorescence microplate reader. Results are the mean and SEM of two independent experiments. Representatives from at least two independent experiments are shown for western blots.
