# Supplementary material
Source: PubMed Central journal article supplement (PMC6888900)
Supplement: 41422_2019_231_MOESM6_ESM.pdf [file 41422_2019_231_MOESM6_ESM.pdf]

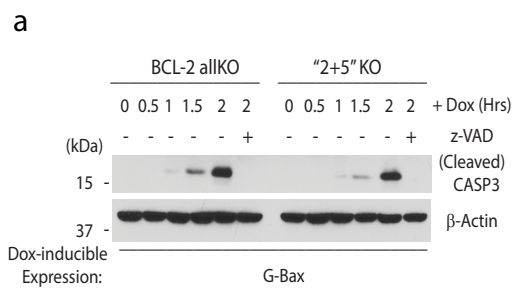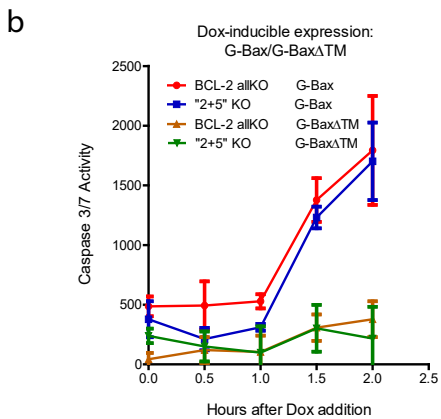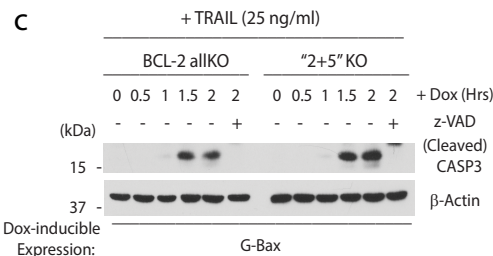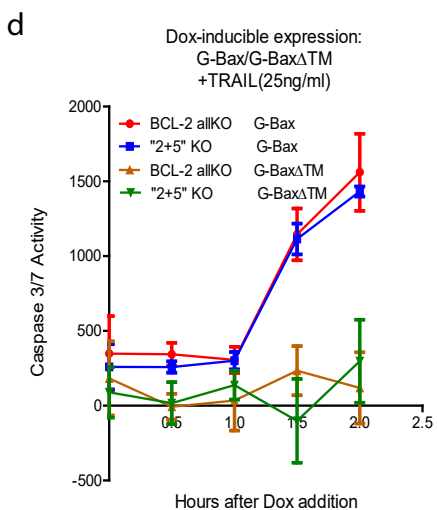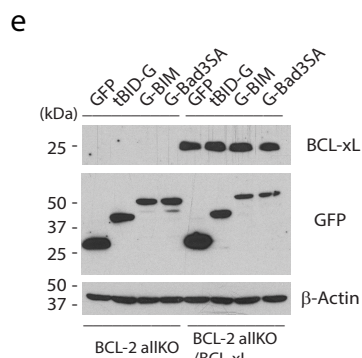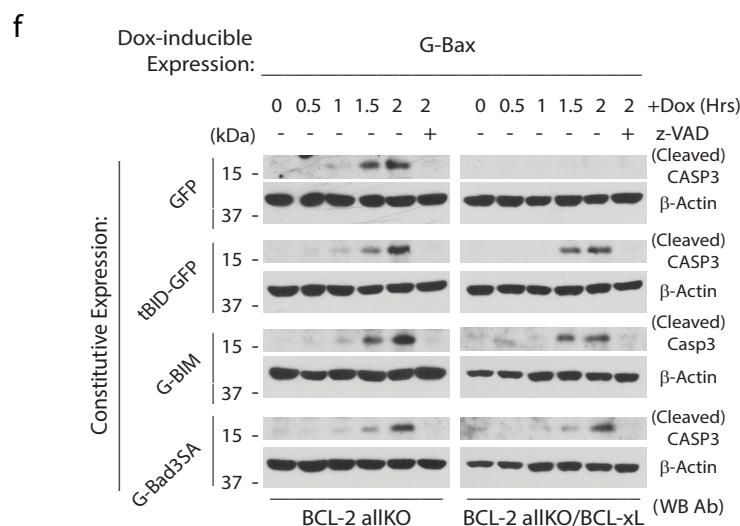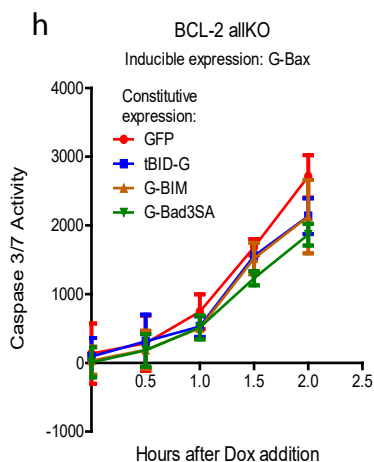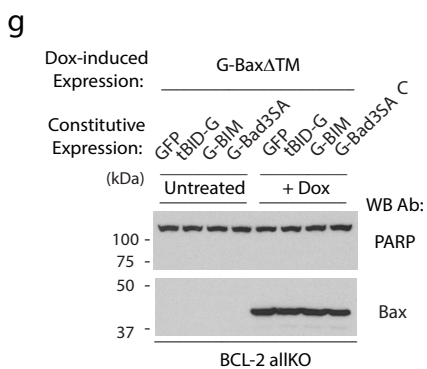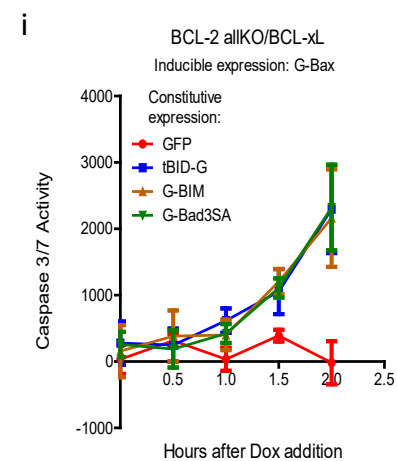

**Fig. S6 BH3-only proteins do not accelerate BAX-mediated apoptosis in the absence of anti-apoptotic BCL-2 family proteins.**

(a) Cell lysates in Fig. 3b were subjected to western blot with the indicated antibodies. (b) Cells from Fig. 3b were treated with Dox for the indicated time points before subjected to Apo-ONE homogenous Caspase-3/7 Assay. Results are the mean and SEM of two independent experiments. (c) Cell lysates in Fig. 3e were subjected to western blot with the indicated antibodies. (d) Cells from Fig. 3e were treated with Dox for the indicated time points before subjected to Apo-ONE homogenous Caspase-3/7 Assay. Results are the mean and SEM of two independent experiments. (e) Generation of BCL-2 allKO cells stably expressing the indicated BH3-only proteins as GFP chimeras with or without the stable expression of BCL-xL. Whole cell lysates were analyzed by western blot (f) Cells in Fig. 3h were treated with Dox for indicated time points before harvested for western blot. (g) The BCL-2 allKO cells with the constitutive and Dox-induced expression of the indicated proteins were treated with Dox (2 $\mu$ g/ml) for 4 hours and harvested for western blot. (h, i) Cells in (f) were treated with Dox for the indicated time points before subjected to Apo-ONE homogenous Caspase-3/7 Assay. Results are the mean and SEM of two independent experiments. Representatives from at least two independent experiments are shown for western blots.
