# Supplementary material
Source: PubMed Central journal article supplement (PMC6888900)
Supplement: 41422_2019_231_MOESM7_ESM.pdf [file 41422_2019_231_MOESM7_ESM.pdf]

a

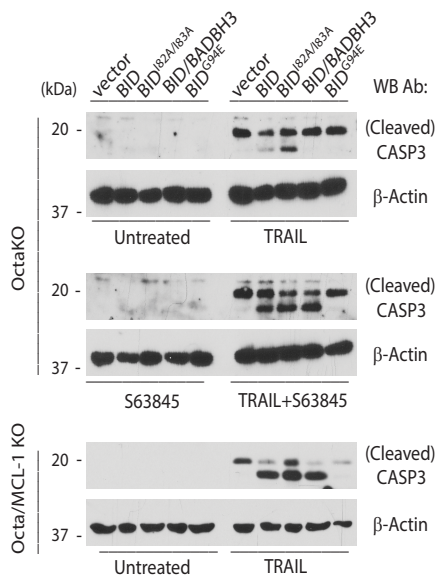

b

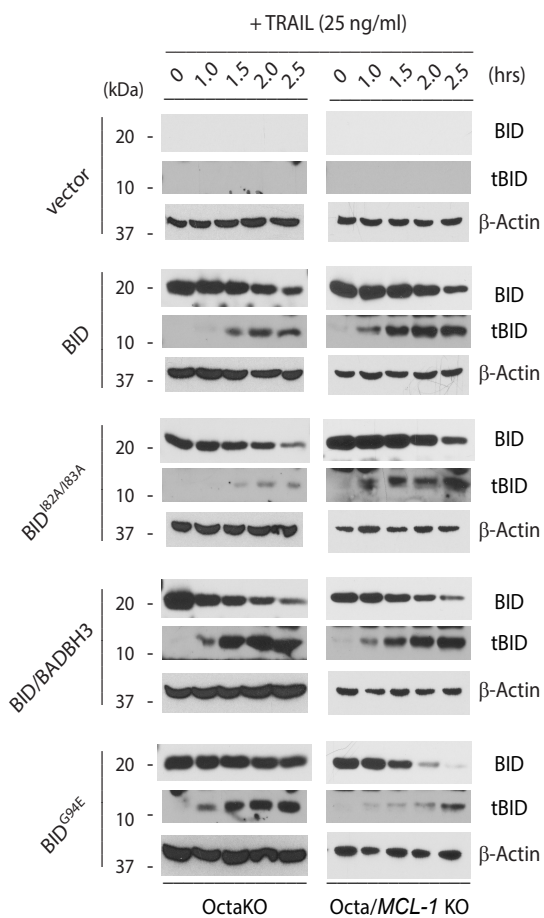

**Fig. S7 The direct activation-deficient mutants of BID are able to fully reconstitute the death receptor mediated, BAX/BAK-dependent apoptosis pathway.**

(a) Cell lysates in Fig. 4c were subjected to western blot with the indicated antibodies. (b) Cell lysates in Fig. 4f were subjected to western blot with the indicated antibodies. Representatives from at least two independent experiments are shown.
