# Supplementary material
Source: PubMed Central journal article supplement (PMC6888900)
Supplement: 41422_2019_231_MOESM9_ESM.pdf [file 41422_2019_231_MOESM9_ESM.pdf]

**Table S1. Mutations in the targeted loci of KO cell lines.**

| Cell Name                          | Gene          | Clone# | Parental Clone            | Exon targeted | Edited alleles | Mutations                      |                                 |
|------------------------------------|---------------|--------|---------------------------|---------------|----------------|--------------------------------|---------------------------------|
| "2+5" KO                           | <i>BAX</i>    | 2      |                           | 4             | 1              | 1 bp insertion                 |                                 |
|                                    |               |        |                           | 4             | 2              | 2 bp insertion                 |                                 |
|                                    | <i>BAK</i>    |        |                           |               | 5              | 1                              | 1 bp insertion                  |
|                                    |               |        |                           |               | 5              | 2                              | 465 bp insertion, w/ stop codon |
|                                    | <i>BCL-xL</i> |        |                           |               | 1              | 1, 2                           | 238 bp insertion                |
|                                    | <i>BCL-2</i>  |        |                           |               | 1              | 1                              | 2 bp insertion                  |
|                                    |               |        |                           |               | 1              | 2                              | 1 bp deletion                   |
|                                    | <i>BCL-w</i>  |        |                           |               | 3              | 1,2                            | 9 bp deletion                   |
|                                    | <i>MCL-1</i>  |        |                           |               | 1              | 1                              | 14 bp deletion                  |
|                                    |               |        |                           |               | 1              | 2                              | 742 bp insertion                |
|                                    | <i>A1</i>     |        |                           | 1             | 1, 2           | 1 bp insertion                 |                                 |
| Octa/ <i>MCL-1</i> / <i>BAX</i> KO | <i>BAX</i>    | 1      | Octa/ <i>MCL-1</i> KO #10 | 4             | 1, 2           | 1 bp deletion                  |                                 |
| Octa/ <i>MCL-1</i> / <i>BAK</i> KO | <i>BAK</i>    | 30     | Octa/ <i>MCL-1</i> KO #10 | 5             | 1, 2           | 1 bp insertion                 |                                 |
| Octa/ <i>BCL-xL</i> KO             | <i>BCL-xL</i> | 5      | OctaKO # 8                | 1             | 1              | 313 bp insertion w/ stop codon |                                 |
|                                    |               |        |                           | 1             | 2              | 330 bp insertion w/ stop codon |                                 |
